# Supplementary material
Source: Springer Nature journal article supplement (https://www.springermedizin.de/resource/supplementary/13256_2008_1141_MOESM3_ESM.pdf/9647098)

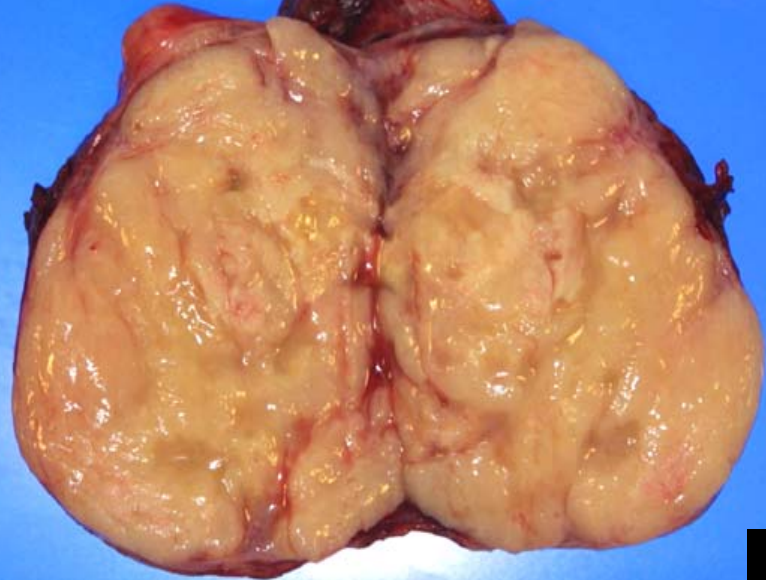**A**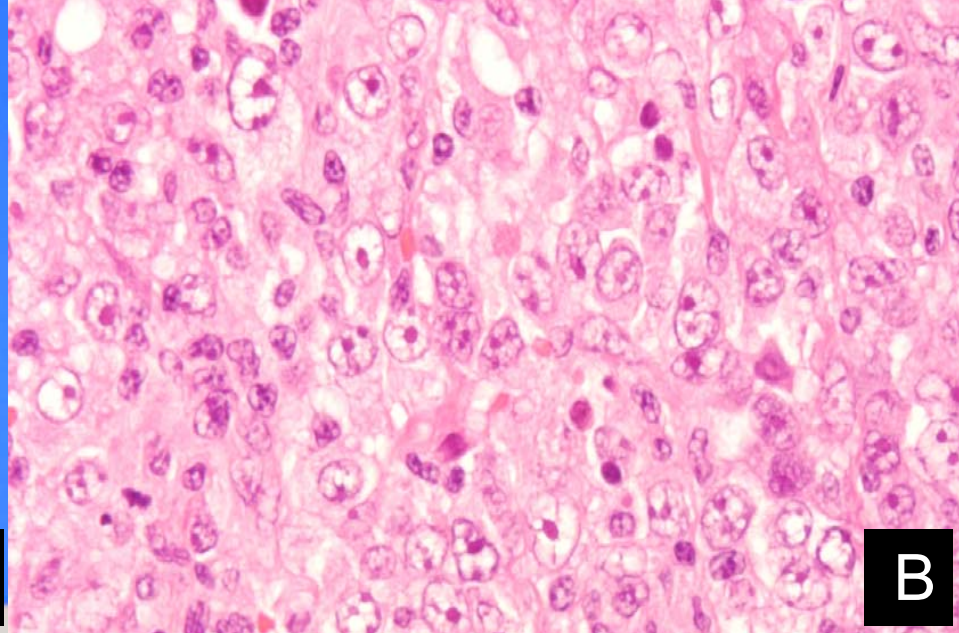**B**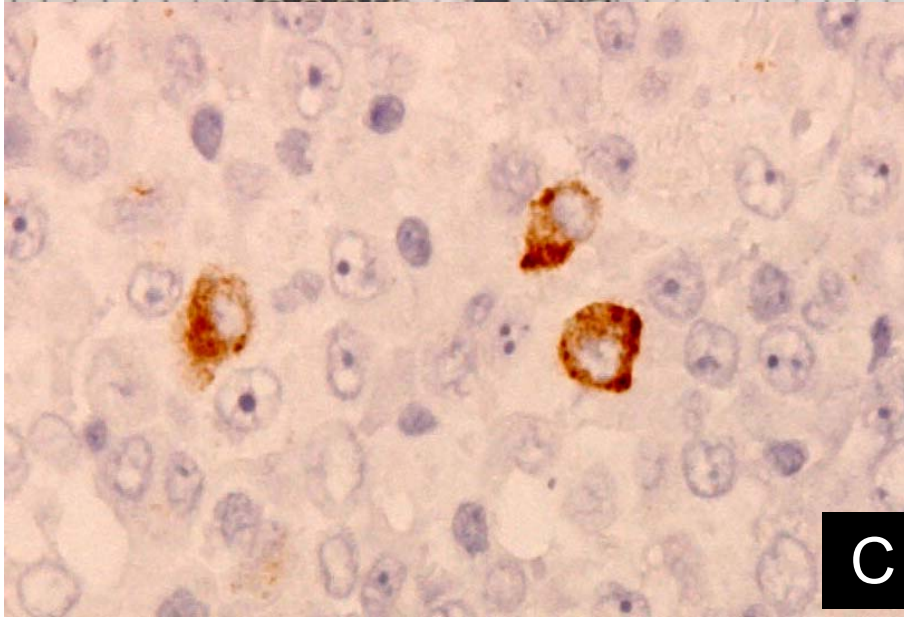**C**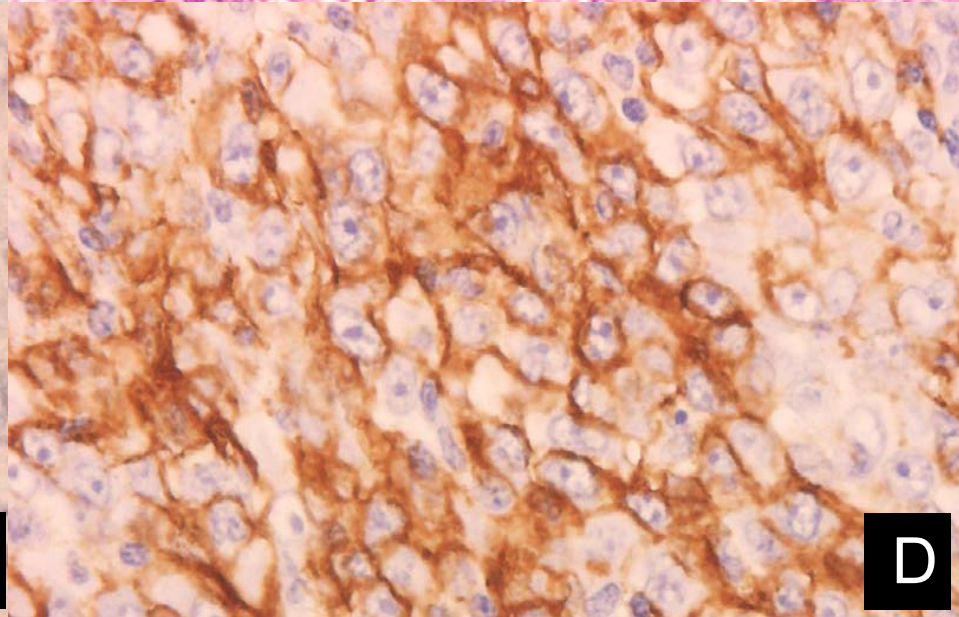**D**

Supplement: MOESM3 [file 9647098]
